# Supplementary material for: A “Candidate-Interactome” Aggregate Analysis of Genome-Wide Association Data in Multiple Sclerosis
Source: PLoS One. 2013 May 16;8(5):e63300. doi: 10.1371/journal.pone.0063300 (PMC3655974; doi:10.1371/journal.pone.0063300)
Supplement: Table S3 — List of genes within molecular and functional classes in the three MS-associated interactomes (p-value cut-off<0.05). MS = multiple sclerosis; HIV = Human Immunodeficiency virus; EBV = Epstein Barr virus; HBV = Hepatitis B virus; MHC = Major histocompatibility complex (XLS) [file pone.0063300.s003.xls]

## Sheet: Table S3
Table S3: List of genes within molecular and functional classes in the three MS-associated interactomes (p-value cut-off<0.05)
Interactome	Molecular and Functional classes	Genes (p-value, number of SNPs)
EBV with MHC	Amino Acid Metabolism	PRMT1 (p=0.004818 n=5),EFEMP1 (p=0.008233 n=17),CD74 (p=0.02093 n=7)
	Carbohydrate Metabolism	FN1 (p=0.01022 n=25),GAPDH (p=0.0002179 n=6)
	Cell Cycle	TRAF2 (p=0.01553 n=6),FN1 (p=0.01022 n=25),ACTN4 (p=0.007501 n=16),NFKB1 (p=3.531e-05 n=18),SERTAD1 (p=0.04319 n=5),TSG101 (p=0.003161 n=12)
	Cell Death and Survival	SRI (p=0.01698 n=10),FN1 (p=0.01022 n=25),HLA-A (p<1.0e-08 n=9),BAG6 (p<1.0e-08 n=15),GAPDH (p=0.0002179 n=6),VIM (p=0.0001999 n=7),CD74 (p=0.02093 n=7),SLIT2 (p=0.004025 n=95),NFKB1 (p=3.531e-05 n=18),RBP1 (p=0.0292 n=13),TSG101 (p=0.003161 n=12),ZMYND11 (p=0.04869 n=12),TRAF2 (p=0.01553 n=6),CD5L (p=6.354e-05 n=16),TUBA1A (p=0.04761 n=2),IMMT (p=0.02121 n=15),DKK3 (p=0.02707 n=47),EFEMP1 (p=0.0…
	Cell Morphology	SLIT3 (p=0.004764 n=243),FN1 (p=0.01022 n=25),NCKIPSD (p=0.04193 n=4),VWF (p=0.001967 n=56),VIM (p=0.0001999 n=7),SLIT2 (p=0.004025 n=95),TSG101 (p=0.003161 n=12),PRMT1 (p=0.004818 n=5),TUBA1A (p=0.04761 n=2),DKK3 (p=0.02707 n=47),LAMB1 (p=0.003098 n=28),ACTN4 (p=0.007501 n=16),ACTN1 (p=0.03681 n=58),MARCO (p=0.0006446 n=19)
	Cell-To-Cell Signaling and Interaction	SLIT3 (p=0.004764 n=243),SRI (p=0.01698 n=10),FN1 (p=0.01022 n=25),NCKIPSD (p=0.04193 n=4),FBLN5 (p=0.01322 n=42),HLA-A (p<1.0e-08 n=9),VWF (p=0.001967 n=56),VIM (p=0.0001999 n=7),SLIT2 (p=0.004025 n=95),CD74 (p=0.02093 n=7),EGFL7 (p=0.00356 n=8),TRAF2 (p=0.01553 n=6),DKK3 (p=0.02707 n=47),ACTN4 (p=0.007501 n=16),ACTN1 (p=0.03681 n=58),MARCO (p=0.0006446 n=19)
	Cellular Assembly and Organization	SRI (p=0.01698 n=10),NCKIPSD (p=0.04193 n=4),FN1 (p=0.01022 n=25),GAPDH (p=0.0002179 n=6),VWF (p=0.001967 n=56),VIM (p=0.0001999 n=7),SLIT2 (p=0.004025 n=95),CD74 (p=0.02093 n=7),SERTAD1 (p=0.04319 n=5),TSG101 (p=0.003161 n=12),RBP1 (p=0.0292 n=13),ARHGEF10L (p=0.02 n=41),IQGAP2 (p=0.0002862 n=118),PRMT1 (p=0.004818 n=5),TUBA1A (p=0.04761 n=2),IMMT (p=0.02121 n=15),DKK3 (p=0.02707 n=47),LAMB1 (p=…
	Cellular Compromise	FN1 (p=0.01022 n=25),VWF (p=0.001967 n=56),VIM (p=0.0001999 n=7),SLIT2 (p=0.004025 n=95),MARCO (p=0.0006446 n=19)
	Cellular Development	FN1 (p=0.01022 n=25),FBLN5 (p=0.01322 n=42),BAG6 (p<1.0e-08 n=15),VIM (p=0.0001999 n=7),CD74 (p=0.02093 n=7),SLIT2 (p=0.004025 n=95),SERTAD1 (p=0.04319 n=5),NFKB1 (p=3.531e-05 n=18),RBP1 (p=0.0292 n=13),TSG101 (p=0.003161 n=12),CD5L (p=6.354e-05 n=16),TRAF2 (p=0.01553 n=6),PRMT1 (p=0.004818 n=5),IQGAP2 (p=0.0002862 n=118),TUBA1A (p=0.04761 n=2),IMMT (p=0.02121 n=15),DKK3 (p=0.02707 n=47),LAMB1 (p…
	Cellular Function and Maintenance	NCKIPSD (p=0.04193 n=4),FN1 (p=0.01022 n=25),VWF (p=0.001967 n=56),VIM (p=0.0001999 n=7),SLIT2 (p=0.004025 n=95),NFKB1 (p=3.531e-05 n=18),TSG101 (p=0.003161 n=12),ARHGEF10L (p=0.02 n=41),PRMT1 (p=0.004818 n=5),DKK3 (p=0.02707 n=47),LAMB1 (p=0.003098 n=28),HLA-B (p<1.0e-08 n=7),ACTN1 (p=0.03681 n=58),MARCO (p=0.0006446 n=19)
	Cellular Growth and Proliferation	SLIT3 (p=0.004764 n=243),FN1 (p=0.01022 n=25),FBLN5 (p=0.01322 n=42),VIM (p=0.0001999 n=7),SLIT2 (p=0.004025 n=95),CD74 (p=0.02093 n=7),NFKB1 (p=3.531e-05 n=18),SERTAD1 (p=0.04319 n=5),RBP1 (p=0.0292 n=13),TSG101 (p=0.003161 n=12),EGFL7 (p=0.00356 n=8),ZMYND11 (p=0.04869 n=12),IQGAP2 (p=0.0002862 n=118),PRMT1 (p=0.004818 n=5),TRAF2 (p=0.01553 n=6),IMMT (p=0.02121 n=15),DKK3 (p=0.02707 n=47),LAMB1…
	Cellular Movement	SLIT3 (p=0.004764 n=243),FN1 (p=0.01022 n=25),FBLN5 (p=0.01322 n=42),VWF (p=0.001967 n=56),VIM (p=0.0001999 n=7),SLIT2 (p=0.004025 n=95),CD74 (p=0.02093 n=7),NFKB1 (p=3.531e-05 n=18),EGFL7 (p=0.00356 n=8),SP100 (p=0.004688 n=45),TUBA1A (p=0.04761 n=2),DKK3 (p=0.02707 n=47),LAMB1 (p=0.003098 n=28),ACTN4 (p=0.007501 n=16),EFEMP1 (p=0.008233 n=17)
	Cellular Response to Therapeutics	TRAF2 (p=0.01553 n=6)
	DNA Replication, Recombination, and Repair	VIM (p=0.0001999 n=7),SERTAD1 (p=0.04319 n=5)
	Drug Metabolism	DKK3 (p=0.02707 n=47)
	Energy Production	IMMT (p=0.02121 n=15)
	Gene Expression	MDFI (p=0.003183 n=18),SP100 (p=0.004688 n=45)
	Lipid Metabolism	CCHCR1 (p<1.0e-08 n=32),IMMT (p=0.02121 n=15),DKK3 (p=0.02707 n=47),CD74 (p=0.02093 n=7),NFKB1 (p=3.531e-05 n=18),RBP1 (p=0.0292 n=13),MARCO (p=0.0006446 n=19)
	Molecular Transport	SRI (p=0.01698 n=10),FN1 (p=0.01022 n=25),GAPDH (p=0.0002179 n=6),CD74 (p=0.02093 n=7),MARCO (p=0.0006446 n=19)
	Nucleic Acid Metabolism	GAPDH (p=0.0002179 n=6)
	Post-Translational Modification	PRMT1 (p=0.004818 n=5),EFEMP1 (p=0.008233 n=17),CD74 (p=0.02093 n=7)
	Protein Trafficking	MDFI (p=0.003183 n=18),FN1 (p=0.01022 n=25)
	Small Molecule Biochemistry	PRMT1 (p=0.004818 n=5),FN1 (p=0.01022 n=25),CCHCR1 (p<1.0e-08 n=32),IMMT (p=0.02121 n=15),DKK3 (p=0.02707 n=47),GAPDH (p=0.0002179 n=6),EFEMP1 (p=0.008233 n=17),CD74 (p=0.02093 n=7),NFKB1 (p=3.531e-05 n=18),RBP1 (p=0.0292 n=13),MARCO (p=0.0006446 n=19)
EBV without MHC	Amino Acid Metabolism	PRMT1 (p=0.004818 n=5),EFEMP1 (p=0.008233 n=17),CD74 (p=0.02093 n=7)
	Carbohydrate Metabolism	FN1 (p=0.01022 n=25),GAPDH (p=0.0002179 n=6)
	Cell Cycle	TRAF2 (p=0.01553 n=6),FN1 (p=0.01022 n=25),ACTN4 (p=0.007501 n=16),NFKB1 (p=3.531e-05 n=18),SERTAD1 (p=0.04319 n=5),TSG101 (p=0.003161 n=12)
	Cell Death and Survival	SRI (p=0.01698 n=10),FN1 (p=0.01022 n=25),GAPDH (p=0.0002179 n=6),VIM (p=0.0001999 n=7),CD74 (p=0.02093 n=7),SLIT2 (p=0.004025 n=95),NFKB1 (p=3.531e-05 n=18),RBP1 (p=0.0292 n=13),TSG101 (p=0.003161 n=12),ZMYND11 (p=0.04869 n=12),TRAF2 (p=0.01553 n=6),CD5L (p=6.354e-05 n=16),TUBA1A (p=0.04761 n=2),IMMT (p=0.02121 n=15),DKK3 (p=0.02707 n=47),EFEMP1 (p=0.008233 n=17)
	Cell Morphology	SLIT3 (p=0.004764 n=243),FN1 (p=0.01022 n=25),NCKIPSD (p=0.04193 n=4),VWF (p=0.001967 n=56),VIM (p=0.0001999 n=7),SLIT2 (p=0.004025 n=95),TSG101 (p=0.003161 n=12),PRMT1 (p=0.004818 n=5),TUBA1A (p=0.04761 n=2),DKK3 (p=0.02707 n=47),LAMB1 (p=0.003098 n=28),ACTN4 (p=0.007501 n=16),ACTN1 (p=0.03681 n=58),MARCO (p=0.0006446 n=19)
	Cell-To-Cell Signaling and Interaction	SLIT3 (p=0.004764 n=243),SRI (p=0.01698 n=10),FN1 (p=0.01022 n=25),NCKIPSD (p=0.04193 n=4),FBLN5 (p=0.01322 n=42),VWF (p=0.001967 n=56),VIM (p=0.0001999 n=7),SLIT2 (p=0.004025 n=95),CD74 (p=0.02093 n=7),EGFL7 (p=0.00356 n=8),TRAF2 (p=0.01553 n=6),DKK3 (p=0.02707 n=47),ACTN4 (p=0.007501 n=16),ACTN1 (p=0.03681 n=58),MARCO (p=0.0006446 n=19)
	Cellular Assembly and Organization	SRI (p=0.01698 n=10),NCKIPSD (p=0.04193 n=4),FN1 (p=0.01022 n=25),GAPDH (p=0.0002179 n=6),VWF (p=0.001967 n=56),VIM (p=0.0001999 n=7),SLIT2 (p=0.004025 n=95),CD74 (p=0.02093 n=7),SERTAD1 (p=0.04319 n=5),TSG101 (p=0.003161 n=12),RBP1 (p=0.0292 n=13),ARHGEF10L (p=0.02 n=41),IQGAP2 (p=0.0002862 n=118),PRMT1 (p=0.004818 n=5),TUBA1A (p=0.04761 n=2),IMMT (p=0.02121 n=15),DKK3 (p=0.02707 n=47),LAMB1 (p=…
	Cellular Compromise	FN1 (p=0.01022 n=25),VWF (p=0.001967 n=56),VIM (p=0.0001999 n=7),SLIT2 (p=0.004025 n=95),MARCO (p=0.0006446 n=19)
	Cellular Development	FN1 (p=0.01022 n=25),FBLN5 (p=0.01322 n=42),VIM (p=0.0001999 n=7),CD74 (p=0.02093 n=7),SLIT2 (p=0.004025 n=95),SERTAD1 (p=0.04319 n=5),NFKB1 (p=3.531e-05 n=18),RBP1 (p=0.0292 n=13),TSG101 (p=0.003161 n=12),CD5L (p=6.354e-05 n=16),TRAF2 (p=0.01553 n=6),PRMT1 (p=0.004818 n=5),IQGAP2 (p=0.0002862 n=118),TUBA1A (p=0.04761 n=2),IMMT (p=0.02121 n=15),DKK3 (p=0.02707 n=47),LAMB1 (p=0.003098 n=28),LTBP4 …
	Cellular Function and Maintenance	NCKIPSD (p=0.04193 n=4),FN1 (p=0.01022 n=25),VWF (p=0.001967 n=56),VIM (p=0.0001999 n=7),SLIT2 (p=0.004025 n=95),NFKB1 (p=3.531e-05 n=18),TSG101 (p=0.003161 n=12),ARHGEF10L (p=0.02 n=41),PRMT1 (p=0.004818 n=5),DKK3 (p=0.02707 n=47),LAMB1 (p=0.003098 n=28),ACTN1 (p=0.03681 n=58),MARCO (p=0.0006446 n=19)
	Cellular Growth and Proliferation	SLIT3 (p=0.004764 n=243),FN1 (p=0.01022 n=25),FBLN5 (p=0.01322 n=42),VIM (p=0.0001999 n=7),SLIT2 (p=0.004025 n=95),CD74 (p=0.02093 n=7),SERTAD1 (p=0.04319 n=5),NFKB1 (p=3.531e-05 n=18),RBP1 (p=0.0292 n=13),TSG101 (p=0.003161 n=12),EGFL7 (p=0.00356 n=8),ZMYND11 (p=0.04869 n=12),IQGAP2 (p=0.0002862 n=118),PRMT1 (p=0.004818 n=5),TRAF2 (p=0.01553 n=6),IMMT (p=0.02121 n=15),DKK3 (p=0.02707 n=47),LAMB1…
	Cellular Movement	SLIT3 (p=0.004764 n=243),FN1 (p=0.01022 n=25),FBLN5 (p=0.01322 n=42),VWF (p=0.001967 n=56),VIM (p=0.0001999 n=7),SLIT2 (p=0.004025 n=95),CD74 (p=0.02093 n=7),NFKB1 (p=3.531e-05 n=18),EGFL7 (p=0.00356 n=8),SP100 (p=0.004688 n=45),TUBA1A (p=0.04761 n=2),DKK3 (p=0.02707 n=47),LAMB1 (p=0.003098 n=28),ACTN4 (p=0.007501 n=16),EFEMP1 (p=0.008233 n=17)
	Cellular Response to Therapeutics	TRAF2 (p=0.01553 n=6)
	DNA Replication, Recombination, and Repair	VIM (p=0.0001999 n=7),SERTAD1 (p=0.04319 n=5)
	Drug Metabolism	DKK3 (p=0.02707 n=47)
	Energy Production	IMMT (p=0.02121 n=15)
	Gene Expression	MDFI (p=0.003183 n=18),SP100 (p=0.004688 n=45)
	Lipid Metabolism	IMMT (p=0.02121 n=15),DKK3 (p=0.02707 n=47),RBP1 (p=0.0292 n=13),MARCO (p=0.0006446 n=19)
	Molecular Transport	SRI (p=0.01698 n=10),FN1 (p=0.01022 n=25),GAPDH (p=0.0002179 n=6),CD74 (p=0.02093 n=7),MARCO (p=0.0006446 n=19)
	Nucleic Acid Metabolism	GAPDH (p=0.0002179 n=6)
	Post-Translational Modification	PRMT1 (p=0.004818 n=5),LTBP4 (p=7.955e-05 n=11),EFEMP1 (p=0.008233 n=17),CD74 (p=0.02093 n=7),CTSC (p=0.04704 n=25)
	Protein Synthesis	LTBP4 (p=7.955e-05 n=11),CTSC (p=0.04704 n=25)
	Protein Trafficking	MDFI (p=0.003183 n=18),FN1 (p=0.01022 n=25)
	Small Molecule Biochemistry	PRMT1 (p=0.004818 n=5),FN1 (p=0.01022 n=25),IMMT (p=0.02121 n=15),DKK3 (p=0.02707 n=47),GAPDH (p=0.0002179 n=6),EFEMP1 (p=0.008233 n=17),CD74 (p=0.02093 n=7),RBP1 (p=0.0292 n=13),MARCO (p=0.0006446 n=19)
HBV with MHC	Amino Acid Metabolism	CD81 (p=0.03989 n=10),SRPK1 (p=0.009701 n=9),MAPK1 (p=3.989e-06 n=14),MAPK8 (p=0.003827 n=15),CD44 (p=0.005383 n=57),MAPK9 (p=0.01864 n=21),IL6 (p=1.885e-05 n=9),HNF4A (p=0.005812 n=37)
	Carbohydrate Metabolism	SREBF1 (p=0.02153 n=8),MPDU1 (p=0.001341 n=5),CD44 (p=0.005383 n=57),IL6 (p=1.885e-05 n=9),SKP2 (p=0.03002 n=14)
	Cell Cycle	MAPK1 (p=3.989e-06 n=14),HSPA1A/HSPA1B,EGR1 (p=0.002377 n=7),MAPK8 (p=0.003827 n=15),MAPK9 (p=0.01864 n=21),IL6 (p=1.885e-05 n=9),DDB2 (p=0.001827 n=6),NFKB1 (p=3.531e-05 n=18),SKP2 (p=0.03002 n=14),SRPK2 (p=0.01001 n=22),SREBF1 (p=0.02153 n=8),CREB1 (p=0.007753 n=6),CD44 (p=0.005383 n=57),STAT1 (p=0.005298 n=20)
	Cell Death and Survival	CD81 (p=0.03989 n=10),SRPK1 (p=0.009701 n=9),JAK1 (p=0.001337 n=25),MAPK1 (p=3.989e-06 n=14),DNMT3A (p=0.001731 n=18),PPP2CA (p=6.711e-05 n=6),HSPA1A/HSPA1B,EGR1 (p=0.002377 n=7),MAPK8 (p=0.003827 n=15),MAPK9 (p=0.01864 n=21),DDB2 (p=0.001827 n=6),IL6 (p=1.885e-05 n=9),NFKB1 (p=3.531e-05 n=18),TPSAB1/TPSB2,SKP2 (p=0.03002 n=14),HSP90B1 (p=0.02041 n=27),NFKBIA (p=0.02301 n=10),ERCC3 (p=0.04741 n=8…
	Cell Morphology	NFKBIA (p=0.02301 n=10),MAPK1 (p=3.989e-06 n=14),MAPK8 (p=0.003827 n=15),CD44 (p=0.005383 n=57),CFLAR (p=0.01681 n=7),IL6 (p=1.885e-05 n=9),NFKB1 (p=3.531e-05 n=18),HNF4A (p=0.005812 n=37)
	Cell Signaling	SRPK2 (p=0.01001 n=22),HSP90B1 (p=0.02041 n=27),SRPK1 (p=0.009701 n=9),MAPK1 (p=3.989e-06 n=14),HSPA1A/HSPA1B,MAPK8 (p=0.003827 n=15),MAPK9 (p=0.01864 n=21),IL6 (p=1.885e-05 n=9),STAT1 (p=0.005298 n=20)
	Cell-To-Cell Signaling and Interaction	CD81 (p=0.03989 n=10),HSP90B1 (p=0.02041 n=27),NFKBIA (p=0.02301 n=10),JAK1 (p=0.001337 n=25),MAPK1 (p=3.989e-06 n=14),HSPA1A/HSPA1B,EGR1 (p=0.002377 n=7),CREB1 (p=0.007753 n=6),MAPK8 (p=0.003827 n=15),CD44 (p=0.005383 n=57),IL6 (p=1.885e-05 n=9),HNF4A (p=0.005812 n=37),STAT1 (p=0.005298 n=20),TPSAB1/TPSB2
	Cellular Assembly and Organization	MAPK1 (p=3.989e-06 n=14),CREB1 (p=0.007753 n=6),MAPK8 (p=0.003827 n=15),CD44 (p=0.005383 n=57),MAPK9 (p=0.01864 n=21),IL6 (p=1.885e-05 n=9)
	Cellular Compromise	HSP90B1 (p=0.02041 n=27),MAPK1 (p=3.989e-06 n=14),HSPA1A/HSPA1B,CD44 (p=0.005383 n=57),MAPK8 (p=0.003827 n=15),IL6 (p=1.885e-05 n=9),HNF4A (p=0.005812 n=37)
	Cellular Development	CD81 (p=0.03989 n=10),JAK1 (p=0.001337 n=25),MAPK1 (p=3.989e-06 n=14),DNMT3A (p=0.001731 n=18),HSPA1A/HSPA1B,PPP2CA (p=6.711e-05 n=6),EGR1 (p=0.002377 n=7),MAPK8 (p=0.003827 n=15),MAPK9 (p=0.01864 n=21),IL6 (p=1.885e-05 n=9),DDB2 (p=0.001827 n=6),NFKB1 (p=3.531e-05 n=18),SKP2 (p=0.03002 n=14),HSP90B1 (p=0.02041 n=27),NFKBIA (p=0.02301 n=10),SREBF1 (p=0.02153 n=8),ERCC3 (p=0.04741 n=8),CREB1 (p=0.…
	Cellular Function and Maintenance	MAPK1 (p=3.989e-06 n=14),HSPA1A/HSPA1B,PPP2CA (p=6.711e-05 n=6),EGR1 (p=0.002377 n=7),MAPK8 (p=0.003827 n=15),MAPK9 (p=0.01864 n=21),IL6 (p=1.885e-05 n=9),NFKB1 (p=3.531e-05 n=18),SKP2 (p=0.03002 n=14),HSP90B1 (p=0.02041 n=27),NFKBIA (p=0.02301 n=10),CREB1 (p=0.007753 n=6),CD44 (p=0.005383 n=57),CFLAR (p=0.01681 n=7),JAG1 (p=0.0296 n=14),STAT1 (p=0.005298 n=20)
	Cellular Growth and Proliferation	CD81 (p=0.03989 n=10),JAK1 (p=0.001337 n=25),MAPK1 (p=3.989e-06 n=14),PPP2CA (p=6.711e-05 n=6),HSPA1A/HSPA1B,TM4SF4 (p=0.0386 n=25),EGR1 (p=0.002377 n=7),MAPK8 (p=0.003827 n=15),MAPK9 (p=0.01864 n=21),IL6 (p=1.885e-05 n=9),DDB2 (p=0.001827 n=6),NFKB1 (p=3.531e-05 n=18),SKP2 (p=0.03002 n=14),SRPK2 (p=0.01001 n=22),HSP90B1 (p=0.02041 n=27),NFKBIA (p=0.02301 n=10),SREBF1 (p=0.02153 n=8),ERCC3 (p=0.0…
	Cellular Movement	CD81 (p=0.03989 n=10),JAK1 (p=0.001337 n=25),MAPK1 (p=3.989e-06 n=14),TM4SF4 (p=0.0386 n=25),EGR1 (p=0.002377 n=7),MAPK8 (p=0.003827 n=15),IL6 (p=1.885e-05 n=9),NFKB1 (p=3.531e-05 n=18),SKP2 (p=0.03002 n=14),HSP90B1 (p=0.02041 n=27),NFKBIA (p=0.02301 n=10),CD44 (p=0.005383 n=57),STAT1 (p=0.005298 n=20)
	DNA Replication, Recombination, and Repair	NFKBIA (p=0.02301 n=10),DNMT3A (p=0.001731 n=18),ERCC3 (p=0.04741 n=8),MAPK8 (p=0.003827 n=15),MAPK9 (p=0.01864 n=21),DDB2 (p=0.001827 n=6),IL6 (p=1.885e-05 n=9),STAT1 (p=0.005298 n=20),GTF3A (p=0.02263 n=10),TPSAB1/TPSB2,SKP2 (p=0.03002 n=14)
	Drug Metabolism	CD44 (p=0.005383 n=57),IL6 (p=1.885e-05 n=9)
	Gene Expression	JAK1 (p=0.001337 n=25),MAPK1 (p=3.989e-06 n=14),HSPA1A/HSPA1B,DNMT3A (p=0.001731 n=18),NFKBIE (p=0.04354 n=7),EGR1 (p=0.002377 n=7),MAPK8 (p=0.003827 n=15),MAPK9 (p=0.01864 n=21),DDB2 (p=0.001827 n=6),IL6 (p=1.885e-05 n=9),NFKB1 (p=3.531e-05 n=18),NFKBIA (p=0.02301 n=10),SREBF1 (p=0.02153 n=8),GTF2H4 (p<1.0e-08 n=11),ERCC3 (p=0.04741 n=8),CREB1 (p=0.007753 n=6),CD44 (p=0.005383 n=57),CFLAR (p=0.0…
	Lipid Metabolism	CD81 (p=0.03989 n=10),DBI (p=0.02091 n=8),SREBF1 (p=0.02153 n=8),EGR1 (p=0.002377 n=7),MPDU1 (p=0.001341 n=5),IL6 (p=1.885e-05 n=9),NFKB1 (p=3.531e-05 n=18),HNF4A (p=0.005812 n=37)
	Molecular Transport	CD81 (p=0.03989 n=10),MAPK1 (p=3.989e-06 n=14),SREBF1 (p=0.02153 n=8),ERCC3 (p=0.04741 n=8),EGR1 (p=0.002377 n=7),CD44 (p=0.005383 n=57),IL6 (p=1.885e-05 n=9)
	Post-Translational Modification	CD81 (p=0.03989 n=10),SRPK2 (p=0.01001 n=22),SRPK1 (p=0.009701 n=9),JAK1 (p=0.001337 n=25),MAPK1 (p=3.989e-06 n=14),GTF2H4 (p<1.0e-08 n=11),ERCC3 (p=0.04741 n=8),CREB1 (p=0.007753 n=6),CD44 (p=0.005383 n=57),MAPK8 (p=0.003827 n=15),MAPK9 (p=0.01864 n=21),IL6 (p=1.885e-05 n=9),GTF2H3 (p=0.02815 n=7)
	Protein Synthesis	CD81 (p=0.03989 n=10),HSP90B1 (p=0.02041 n=27),ERCC3 (p=0.04741 n=8)
	Protein Trafficking	CD81 (p=0.03989 n=10),NFKBIA (p=0.02301 n=10),MAPK1 (p=3.989e-06 n=14),ERCC3 (p=0.04741 n=8),NFKBIE (p=0.04354 n=7)
	Small Molecule Biochemistry	CD81 (p=0.03989 n=10),SRPK1 (p=0.009701 n=9),MAPK1 (p=3.989e-06 n=14),DBI (p=0.02091 n=8),HSPA1A/HSPA1B,EGR1 (p=0.002377 n=7),MAPK8 (p=0.003827 n=15),MAPK9 (p=0.01864 n=21),IL6 (p=1.885e-05 n=9),NFKB1 (p=3.531e-05 n=18),SKP2 (p=0.03002 n=14),HSP90B1 (p=0.02041 n=27),SREBF1 (p=0.02153 n=8),MPDU1 (p=0.001341 n=5),CD44 (p=0.005383 n=57),HNF4A (p=0.005812 n=37)
HBV without MHC	Amino Acid Metabolism	CD81 (p=0.03989 n=10),SRPK1 (p=0.009701 n=9),MAPK1 (p=3.989e-06 n=14),MAPK8 (p=0.003827 n=15),CD44 (p=0.005383 n=57),MAPK9 (p=0.01864 n=21),IL6 (p=1.885e-05 n=9),HNF4A (p=0.005812 n=37)
	Carbohydrate Metabolism	SREBF1 (p=0.02153 n=8),MPDU1 (p=0.001341 n=5),CD44 (p=0.005383 n=57),IL6 (p=1.885e-05 n=9),SKP2 (p=0.03002 n=14)
	Cell Cycle	JAK1 (p=0.001337 n=25),MAPK1 (p=3.989e-06 n=14),EGR1 (p=0.002377 n=7),MAPK8 (p=0.003827 n=15),MAPK9 (p=0.01864 n=21),DDB2 (p=0.001827 n=6),IL6 (p=1.885e-05 n=9),NFKB1 (p=3.531e-05 n=18),SKP2 (p=0.03002 n=14),SRPK2 (p=0.01001 n=22),SREBF1 (p=0.02153 n=8),CREB1 (p=0.007753 n=6),CD44 (p=0.005383 n=57),STAT1 (p=0.005298 n=20)
	Cell Death and Survival	CD81 (p=0.03989 n=10),SRPK1 (p=0.009701 n=9),JAK1 (p=0.001337 n=25),MAPK1 (p=3.989e-06 n=14),DNMT3A (p=0.001731 n=18),PPP2CA (p=6.711e-05 n=6),EGR1 (p=0.002377 n=7),MAPK8 (p=0.003827 n=15),MAPK9 (p=0.01864 n=21),DDB2 (p=0.001827 n=6),IL6 (p=1.885e-05 n=9),NFKB1 (p=3.531e-05 n=18),TPSAB1/TPSB2,SKP2 (p=0.03002 n=14),HSP90B1 (p=0.02041 n=27),NFKBIA (p=0.02301 n=10),ERCC3 (p=0.04741 n=8),CREB1 (p=0.0…
	Cell Morphology	NFKBIA (p=0.02301 n=10),MAPK1 (p=3.989e-06 n=14),MAPK8 (p=0.003827 n=15),CD44 (p=0.005383 n=57),CFLAR (p=0.01681 n=7),IL6 (p=1.885e-05 n=9),NFKB1 (p=3.531e-05 n=18),HNF4A (p=0.005812 n=37)
	Cell Signaling	SRPK2 (p=0.01001 n=22),HSP90B1 (p=0.02041 n=27),SRPK1 (p=0.009701 n=9),MAPK1 (p=3.989e-06 n=14),MAPK8 (p=0.003827 n=15),MAPK9 (p=0.01864 n=21),IL6 (p=1.885e-05 n=9),STAT1 (p=0.005298 n=20)
	Cell-To-Cell Signaling and Interaction	CD81 (p=0.03989 n=10),HSP90B1 (p=0.02041 n=27),NFKBIA (p=0.02301 n=10),JAK1 (p=0.001337 n=25),MAPK1 (p=3.989e-06 n=14),EGR1 (p=0.002377 n=7),CREB1 (p=0.007753 n=6),MAPK8 (p=0.003827 n=15),CD44 (p=0.005383 n=57),IL6 (p=1.885e-05 n=9),HNF4A (p=0.005812 n=37),STAT1 (p=0.005298 n=20),TPSAB1/TPSB2
	Cellular Assembly and Organization	MAPK1 (p=3.989e-06 n=14),CREB1 (p=0.007753 n=6),MAPK8 (p=0.003827 n=15),CD44 (p=0.005383 n=57),MAPK9 (p=0.01864 n=21),IL6 (p=1.885e-05 n=9)
	Cellular Compromise	HSP90B1 (p=0.02041 n=27),MAPK1 (p=3.989e-06 n=14),CD44 (p=0.005383 n=57),MAPK8 (p=0.003827 n=15),IL6 (p=1.885e-05 n=9),HNF4A (p=0.005812 n=37)
	Cellular Development	CD81 (p=0.03989 n=10),JAK1 (p=0.001337 n=25),MAPK1 (p=3.989e-06 n=14),DNMT3A (p=0.001731 n=18),PPP2CA (p=6.711e-05 n=6),EGR1 (p=0.002377 n=7),MAPK8 (p=0.003827 n=15),MAPK9 (p=0.01864 n=21),IL6 (p=1.885e-05 n=9),DDB2 (p=0.001827 n=6),NFKB1 (p=3.531e-05 n=18),SKP2 (p=0.03002 n=14),HSP90B1 (p=0.02041 n=27),NFKBIA (p=0.02301 n=10),SREBF1 (p=0.02153 n=8),ERCC3 (p=0.04741 n=8),CREB1 (p=0.007753 n=6),CD…
	Cellular Function and Maintenance	MAPK1 (p=3.989e-06 n=14),PPP2CA (p=6.711e-05 n=6),EGR1 (p=0.002377 n=7),MAPK8 (p=0.003827 n=15),MAPK9 (p=0.01864 n=21),IL6 (p=1.885e-05 n=9),NFKB1 (p=3.531e-05 n=18),SKP2 (p=0.03002 n=14),HSP90B1 (p=0.02041 n=27),NFKBIA (p=0.02301 n=10),CREB1 (p=0.007753 n=6),CD44 (p=0.005383 n=57),CFLAR (p=0.01681 n=7),JAG1 (p=0.0296 n=14),STAT1 (p=0.005298 n=20)
	Cellular Growth and Proliferation	CD81 (p=0.03989 n=10),JAK1 (p=0.001337 n=25),MAPK1 (p=3.989e-06 n=14),TM4SF4 (p=0.0386 n=25),PPP2CA (p=6.711e-05 n=6),EGR1 (p=0.002377 n=7),MAPK8 (p=0.003827 n=15),MAPK9 (p=0.01864 n=21),IL6 (p=1.885e-05 n=9),DDB2 (p=0.001827 n=6),NFKB1 (p=3.531e-05 n=18),SKP2 (p=0.03002 n=14),SRPK2 (p=0.01001 n=22),HSP90B1 (p=0.02041 n=27),NFKBIA (p=0.02301 n=10),SREBF1 (p=0.02153 n=8),ERCC3 (p=0.04741 n=8),CREB…
	Cellular Movement	CD81 (p=0.03989 n=10),JAK1 (p=0.001337 n=25),MAPK1 (p=3.989e-06 n=14),TM4SF4 (p=0.0386 n=25),EGR1 (p=0.002377 n=7),MAPK8 (p=0.003827 n=15),IL6 (p=1.885e-05 n=9),NFKB1 (p=3.531e-05 n=18),SKP2 (p=0.03002 n=14),HSP90B1 (p=0.02041 n=27),NFKBIA (p=0.02301 n=10),CD44 (p=0.005383 n=57),STAT1 (p=0.005298 n=20)
	DNA Replication, Recombination, and Repair	NFKBIA (p=0.02301 n=10),DNMT3A (p=0.001731 n=18),ERCC3 (p=0.04741 n=8),MAPK8 (p=0.003827 n=15),MAPK9 (p=0.01864 n=21),DDB2 (p=0.001827 n=6),IL6 (p=1.885e-05 n=9),STAT1 (p=0.005298 n=20),GTF3A (p=0.02263 n=10),TPSAB1/TPSB2,SKP2 (p=0.03002 n=14)
	Drug Metabolism	CD44 (p=0.005383 n=57),IL6 (p=1.885e-05 n=9)
	Gene Expression	JAK1 (p=0.001337 n=25),MAPK1 (p=3.989e-06 n=14),DNMT3A (p=0.001731 n=18),NFKBIE (p=0.04354 n=7),EGR1 (p=0.002377 n=7),MAPK8 (p=0.003827 n=15),MAPK9 (p=0.01864 n=21),DDB2 (p=0.001827 n=6),IL6 (p=1.885e-05 n=9),NFKB1 (p=3.531e-05 n=18),NFKBIA (p=0.02301 n=10),SREBF1 (p=0.02153 n=8),ERCC3 (p=0.04741 n=8),CREB1 (p=0.007753 n=6),CD44 (p=0.005383 n=57),CFLAR (p=0.01681 n=7),HNF4A (p=0.005812 n=37),STAT…
	Lipid Metabolism	CD81 (p=0.03989 n=10),DBI (p=0.02091 n=8),SREBF1 (p=0.02153 n=8),EGR1 (p=0.002377 n=7),MPDU1 (p=0.001341 n=5),IL6 (p=1.885e-05 n=9),NFKB1 (p=3.531e-05 n=18),HNF4A (p=0.005812 n=37)
	Molecular Transport	CD81 (p=0.03989 n=10),MAPK1 (p=3.989e-06 n=14),SREBF1 (p=0.02153 n=8),ERCC3 (p=0.04741 n=8),EGR1 (p=0.002377 n=7),CD44 (p=0.005383 n=57),IL6 (p=1.885e-05 n=9)
	Post-Translational Modification	CD81 (p=0.03989 n=10),SRPK2 (p=0.01001 n=22),SRPK1 (p=0.009701 n=9),JAK1 (p=0.001337 n=25),MAPK1 (p=3.989e-06 n=14),ERCC3 (p=0.04741 n=8),CREB1 (p=0.007753 n=6),CD44 (p=0.005383 n=57),MAPK8 (p=0.003827 n=15),MAPK9 (p=0.01864 n=21),IL6 (p=1.885e-05 n=9),GTF2H3 (p=0.02815 n=7)
	Protein Synthesis	CD81 (p=0.03989 n=10),HSP90B1 (p=0.02041 n=27),ERCC3 (p=0.04741 n=8)
	Protein Trafficking	CD81 (p=0.03989 n=10),NFKBIA (p=0.02301 n=10),MAPK1 (p=3.989e-06 n=14),ERCC3 (p=0.04741 n=8),NFKBIE (p=0.04354 n=7)
	Small Molecule Biochemistry	CD81 (p=0.03989 n=10),SRPK1 (p=0.009701 n=9),MAPK1 (p=3.989e-06 n=14),DBI (p=0.02091 n=8),EGR1 (p=0.002377 n=7),MAPK8 (p=0.003827 n=15),MAPK9 (p=0.01864 n=21),IL6 (p=1.885e-05 n=9),NFKB1 (p=3.531e-05 n=18),SKP2 (p=0.03002 n=14),HSP90B1 (p=0.02041 n=27),SREBF1 (p=0.02153 n=8),CD44 (p=0.005383 n=57),MPDU1 (p=0.001341 n=5),HNF4A (p=0.005812 n=37)
HIV with MHC	Amino Acid Metabolism	PRMT1 (p=0.004818 n=5),HAT1 (p=0.006391 n=5),COMT (p=0.03903 n=21),MTHFD2 (p=0.008336 n=8),PLOD1 (p=0.03323 n=11),APP (p=0.009438 n=62)
	Cell Cycle	CDKN2A (p=0.0053 n=14),PRKDC (p=0.01746 n=12),MSH2 (p=0.006325 n=35),EIF3E (p=0.002585 n=22),MCM7 (p=0.0006931 n=7),APP (p=0.009438 n=62)
	Cell Death and Survival	SDHA (p=0.001114 n=5),CDKN2A (p=0.0053 n=14),KIR3DL1 (p=0.00084 n=21),AKAP8L (p=0.03422 n=5),PRKDC (p=0.01746 n=12),VPRBP (p=0.001992 n=6),YWHAZ (p=0.01576 n=10),RNF7 (p=0.03305 n=9),PSMA1 (p=0.00245 n=14),EIF3E (p=0.002585 n=22),ITGAL (p=0.03049 n=13),ATP5H (p=0.04158 n=8),APP (p=0.009438 n=62),ITGB2 (p=0.01301 n=25),HSP90B1 (p=0.02041 n=27),HDAC3 (p=0.0003562 n=9),MSH2 (p=0.006325 n=35),COMT (p…
	Cell Morphology	CDKN2A (p=0.0053 n=14),PRKDC (p=0.01746 n=12),ITGB2 (p=0.01301 n=25),PRMT1 (p=0.004818 n=5),DIAPH1 (p=7.851e-05 n=12),CAPN1 (p=0.04059 n=10),COX5A (p=0.001425 n=2),RTN4 (p=0.02925 n=47),ATXN10 (p=0.04526 n=50),NEDD4L (p=0.02774 n=120),APP (p=0.009438 n=62)
	Cell Signaling	ITGB2 (p=0.01301 n=25),KIR3DL1 (p=0.00084 n=21),GRB2 (p=0.003008 n=8),HLA-C (p<1.0e-08 n=15),G3BP1 (p=0.02613 n=5),ITGAL (p=0.03049 n=13),ATP2A2 (p=0.01145 n=5),MCL1 (p=0.009192 n=8),APP (p=0.009438 n=62)
	Cell-To-Cell Signaling and Interaction	CDKN2A (p=0.0053 n=14),TOMM40 (p=0.001972 n=9),KIR3DL1 (p=0.00084 n=21),PRKDC (p=0.01746 n=12),GRB2 (p=0.003008 n=8),HLA-A (p<1.0e-08 n=9),HSPH1 (p=0.04376 n=16),CTNNA3 (p=0.003908 n=416),G3BP1 (p=0.02613 n=5),ITGAL (p=0.03049 n=13),APP (p=0.009438 n=62),ITGB2 (p=0.01301 n=25),HSP90B1 (p=0.02041 n=27),HDAC3 (p=0.0003562 n=9),MSH2 (p=0.006325 n=35),HLA-C (p<1.0e-08 n=15),CAPN1 (p=0.04059 n=10),COM…
	Cellular Assembly and Organization	CDKN2A (p=0.0053 n=14),PRKDC (p=0.01746 n=12),KIR3DL1 (p=0.00084 n=21),SMG6 (p=0.000795 n=48),GRB2 (p=0.003008 n=8),CTNNA3 (p=0.003908 n=416),RANBP2 (p=0.0242 n=3),ATP2A2 (p=0.01145 n=5),APP (p=0.009438 n=62),DDX6 (p=9.957e-05 n=8),DIAPH1 (p=7.851e-05 n=12),PRMT1 (p=0.004818 n=5),CAPN1 (p=0.04059 n=10),RTN4 (p=0.02925 n=47),EIF3A (p=0.0009801 n=6),ATXN10 (p=0.04526 n=50),XPO1 (p=0.02363 n=6),LRPP…
	Cellular Compromise	CDKN2A (p=0.0053 n=14),ITGB2 (p=0.01301 n=25),HSP90B1 (p=0.02041 n=27),HSPH1 (p=0.04376 n=16),ATP2A2 (p=0.01145 n=5),ITGAL (p=0.03049 n=13),COX4I1 (p=0.009028 n=11),APP (p=0.009438 n=62)
	Cellular Development	CDKN2A (p=0.0053 n=14),COPS4 (p=0.03944 n=4),VPRBP (p=0.001992 n=6),GRB2 (p=0.003008 n=8),GAK (p=0.001862 n=22),EIF3E (p=0.002585 n=22),COPS3 (p=0.0006728 n=11),ITGAL (p=0.03049 n=13),MLLT1 (p=0.03627 n=12),AFF1 (p=0.0009123 n=37),APP (p=0.009438 n=62),ITGB2 (p=0.01301 n=25),RNF5 (p<1.0e-08 n=8),DIAPH1 (p=7.851e-05 n=12),PRMT1 (p=0.004818 n=5),HDAC3 (p=0.0003562 n=9),COPS6 (p=0.0006931 n=8),EIF3A…
	Cellular Function and Maintenance	CDKN2A (p=0.0053 n=14),PRKDC (p=0.01746 n=12),SMG6 (p=0.000795 n=48),GRB2 (p=0.003008 n=8),HSPH1 (p=0.04376 n=16),RANBP2 (p=0.0242 n=3),ATP2A2 (p=0.01145 n=5),APP (p=0.009438 n=62),HSP90B1 (p=0.02041 n=27),DIAPH1 (p=7.851e-05 n=12),PRMT1 (p=0.004818 n=5),MSH2 (p=0.006325 n=35),CAPN1 (p=0.04059 n=10),COX5A (p=0.001425 n=2),HLA-B (p<1.0e-08 n=7),RTN4 (p=0.02925 n=47),ATXN10 (p=0.04526 n=50),XPO1 (p…
	Cellular Growth and Proliferation	CDKN2A (p=0.0053 n=14),COPS4 (p=0.03944 n=4),VPRBP (p=0.001992 n=6),GRB2 (p=0.003008 n=8),GAK (p=0.001862 n=22),EIF3E (p=0.002585 n=22),ITGAL (p=0.03049 n=13),COPS3 (p=0.0006728 n=11),APP (p=0.009438 n=62),AFF1 (p=0.0009123 n=37),MLLT1 (p=0.03627 n=12),ITGB2 (p=0.01301 n=25),RNF5 (p<1.0e-08 n=8),PRMT1 (p=0.004818 n=5),HDAC3 (p=0.0003562 n=9),COPS6 (p=0.0006931 n=8),EIF3A (p=0.0009801 n=6),PPP1R12…
	Cellular Movement	ITGB2 (p=0.01301 n=25),GRB2 (p=0.003008 n=8),RTN4 (p=0.02925 n=47),ITGAL (p=0.03049 n=13),APP (p=0.009438 n=62)
	Cellular Response to Therapeutics	PRKDC (p=0.01746 n=12)
	DNA Replication, Recombination, and Repair	ATP5J (p=0.02005 n=6),CDKN2A (p=0.0053 n=14),PRKDC (p=0.01746 n=12),MSH2 (p=0.006325 n=35),ATP5H (p=0.04158 n=8),OLA1 (p=0.00795 n=25),MCM7 (p=0.0006931 n=7),APP (p=0.009438 n=62)
	Drug Metabolism	COMT (p=0.03903 n=21)
	Energy Production	ATP5J (p=0.02005 n=6),MSH2 (p=0.006325 n=35),ATP5H (p=0.04158 n=8),OLA1 (p=0.00795 n=25),APP (p=0.009438 n=62)
	Gene Expression	CASC3 (p=0.007937 n=4),CDKN2A (p=0.0053 n=14),EIF3B (p=0.0001696 n=8),EIF3D (p=0.00274 n=15),EIF3A (p=0.0009801 n=6),EIF3E (p=0.002585 n=22),APP (p=0.009438 n=62),EIF3K (p=0.007501 n=7)
	Lipid Metabolism	SDHA (p=0.001114 n=5),LDLR (p=0.001904 n=18),COMT (p=0.03903 n=21),RTN4 (p=0.02925 n=47),CLN6 (p=0.03084 n=8),APP (p=0.009438 n=62)
	Molecular Transport	CDKN2A (p=0.0053 n=14),KIR3DL1 (p=0.00084 n=21),SMG6 (p=0.000795 n=48),RANBP2 (p=0.0242 n=3),CANX (p=0.04676 n=7),ATP2A2 (p=0.01145 n=5),ITGAL (p=0.03049 n=13),APP (p=0.009438 n=62),ITGB2 (p=0.01301 n=25),LDLR (p=0.001904 n=18),HLA-C (p<1.0e-08 n=15),PDIA4 (p=0.007587 n=10),XPO1 (p=0.02363 n=6)
	Nucleic Acid Metabolism	ATP5J (p=0.02005 n=6),MSH2 (p=0.006325 n=35),ATP5H (p=0.04158 n=8),APP (p=0.009438 n=62),OLA1 (p=0.00795 n=25)
	Post-Translational Modification	FBXW11 (p=0.008805 n=18),CDKN2A (p=0.0053 n=14),PDIA5 (p=0.01907 n=40),NMT1 (p=0.002144 n=24),HAT1 (p=0.006391 n=5),CANX (p=0.04676 n=7),OS9 (p=1.987e-07 n=9),FBXO3 (p=0.006035 n=19),PLOD1 (p=0.03323 n=11),TCEB1 (p=0.01458 n=17),SKP1/SKP1P2,APP (p=0.009438 n=62),PRMT1 (p=0.004818 n=5),RNF5 (p<1.0e-08 n=8),PDIA6 (p=0.006732 n=28),DNAJC7 (p=0.001263 n=8)
	Protein Synthesis	CDKN2A (p=0.0053 n=14),FBXW11 (p=0.008805 n=18),GRB2 (p=0.003008 n=8),CANX (p=0.04676 n=7),EIF3E (p=0.002585 n=22),FBXO3 (p=0.006035 n=19),MARS (p=0.006338 n=7),DDX6 (p=9.957e-05 n=8),DIAPH1 (p=7.851e-05 n=12),HSP90B1 (p=0.02041 n=27),EIF3B (p=0.0001696 n=8),EIF3D (p=0.00274 n=15),EIF3A (p=0.0009801 n=6),CLN6 (p=0.03084 n=8),EIF3K (p=0.007501 n=7)
	Protein Trafficking	CDKN2A (p=0.0053 n=14),RANBP2 (p=0.0242 n=3),PDIA4 (p=0.007587 n=10),XPO1 (p=0.02363 n=6),CANX (p=0.04676 n=7),APP (p=0.009438 n=62)
	RNA Damage and Repair	SMG6 (p=0.000795 n=48),EIF3E (p=0.002585 n=22)
	RNA Post-Transcriptional Modification	CDKN2A (p=0.0053 n=14),CASC3 (p=0.007937 n=4)
	RNA Trafficking	SMG6 (p=0.000795 n=48),EIF3A (p=0.0009801 n=6),XPO1 (p=0.02363 n=6)
	Small Molecule Biochemistry	SDHA (p=0.001114 n=5),ATP5J (p=0.02005 n=6),HAT1 (p=0.006391 n=5),PLOD1 (p=0.03323 n=11),ATP5H (p=0.04158 n=8),APP (p=0.009438 n=62),OLA1 (p=0.00795 n=25),ITGB2 (p=0.01301 n=25),PRMT1 (p=0.004818 n=5),LDLR (p=0.001904 n=18),MSH2 (p=0.006325 n=35),COMT (p=0.03903 n=21),RTN4 (p=0.02925 n=47),MTHFD2 (p=0.008336 n=8),CLN6 (p=0.03084 n=8),MCL1 (p=0.009192 n=8)
HIV without MHC	Amino Acid Metabolism	PRMT1 (p=0.004818 n=5),HAT1 (p=0.006391 n=5),COMT (p=0.03903 n=21),MTHFD2 (p=0.008336 n=8),PLOD1 (p=0.03323 n=11),APP (p=0.009438 n=62)
	Cell Cycle	CDKN2A (p=0.0053 n=14),PRKDC (p=0.01746 n=12),MSH2 (p=0.006325 n=35),VPRBP (p=0.001992 n=6),EIF3E (p=0.002585 n=22),NEDD4L (p=0.02774 n=120),MCM7 (p=0.0006931 n=7),APP (p=0.009438 n=62)
	Cell Death and Survival	SDHA (p=0.001114 n=5),CDKN2A (p=0.0053 n=14),KIR3DL1 (p=0.00084 n=21),AKAP8L (p=0.03422 n=5),PRKDC (p=0.01746 n=12),VPRBP (p=0.001992 n=6),YWHAZ (p=0.01576 n=10),RNF7 (p=0.03305 n=9),PSMA1 (p=0.00245 n=14),EIF3E (p=0.002585 n=22),ITGAL (p=0.03049 n=13),ATP5H (p=0.04158 n=8),APP (p=0.009438 n=62),ITGB2 (p=0.01301 n=25),HSP90B1 (p=0.02041 n=27),HDAC3 (p=0.0003562 n=9),MSH2 (p=0.006325 n=35),COMT (p…
	Cell Morphology	CDKN2A (p=0.0053 n=14),PRKDC (p=0.01746 n=12),ITGB2 (p=0.01301 n=25),PRMT1 (p=0.004818 n=5),DIAPH1 (p=7.851e-05 n=12),CAPN1 (p=0.04059 n=10),COX5A (p=0.001425 n=2),RTN4 (p=0.02925 n=47),ATXN10 (p=0.04526 n=50),NEDD4L (p=0.02774 n=120),APP (p=0.009438 n=62)
	Cell Signaling	ITGB2 (p=0.01301 n=25),KIR3DL1 (p=0.00084 n=21),GRB2 (p=0.003008 n=8),G3BP1 (p=0.02613 n=5),ITGAL (p=0.03049 n=13),ATP2A2 (p=0.01145 n=5),MCL1 (p=0.009192 n=8),APP (p=0.009438 n=62)
	Cell-To-Cell Signaling and Interaction	CDKN2A (p=0.0053 n=14),PRKDC (p=0.01746 n=12),ITGB2 (p=0.01301 n=25),KIR3DL1 (p=0.00084 n=21),HSP90B1 (p=0.02041 n=27),HDAC3 (p=0.0003562 n=9),MSH2 (p=0.006325 n=35),GRB2 (p=0.003008 n=8),CAPN1 (p=0.04059 n=10),COMT (p=0.03903 n=21),CTNNA3 (p=0.003908 n=416),EIF3A (p=0.0009801 n=6),G3BP1 (p=0.02613 n=5),ITGAL (p=0.03049 n=13),MCL1 (p=0.009192 n=8),APP (p=0.009438 n=62)
	Cellular Assembly and Organization	CDKN2A (p=0.0053 n=14),PRKDC (p=0.01746 n=12),KIR3DL1 (p=0.00084 n=21),SMG6 (p=0.000795 n=48),GRB2 (p=0.003008 n=8),CTNNA3 (p=0.003908 n=416),RANBP2 (p=0.0242 n=3),ATP2A2 (p=0.01145 n=5),APP (p=0.009438 n=62),DDX6 (p=9.957e-05 n=8),DIAPH1 (p=7.851e-05 n=12),PRMT1 (p=0.004818 n=5),CAPN1 (p=0.04059 n=10),RTN4 (p=0.02925 n=47),EIF3A (p=0.0009801 n=6),ATXN10 (p=0.04526 n=50),XPO1 (p=0.02363 n=6),LRPP…
	Cellular Compromise	CDKN2A (p=0.0053 n=14),ITGB2 (p=0.01301 n=25),HSP90B1 (p=0.02041 n=27),HSPH1 (p=0.04376 n=16),ATP2A2 (p=0.01145 n=5),ITGAL (p=0.03049 n=13),COX4I1 (p=0.009028 n=11),APP (p=0.009438 n=62)
	Cellular Development	CDKN2A (p=0.0053 n=14),COPS4 (p=0.03944 n=4),VPRBP (p=0.001992 n=6),GAK (p=0.001862 n=22),EIF3E (p=0.002585 n=22),FOXC1 (p=0.01471 n=11),ITGAL (p=0.03049 n=13),COPS3 (p=0.0006728 n=11),MLLT1 (p=0.03627 n=12),AFF1 (p=0.0009123 n=37),APP (p=0.009438 n=62),ITGB2 (p=0.01301 n=25),DIAPH1 (p=7.851e-05 n=12),PRMT1 (p=0.004818 n=5),HDAC3 (p=0.0003562 n=9),COPS6 (p=0.0006931 n=8),EIF3A (p=0.0009801 n=6),R…
	Cellular Function and Maintenance	CDKN2A (p=0.0053 n=14),PRKDC (p=0.01746 n=12),SMG6 (p=0.000795 n=48),GRB2 (p=0.003008 n=8),HSPH1 (p=0.04376 n=16),RANBP2 (p=0.0242 n=3),ATP2A2 (p=0.01145 n=5),APP (p=0.009438 n=62),ITGB2 (p=0.01301 n=25),HSP90B1 (p=0.02041 n=27),DIAPH1 (p=7.851e-05 n=12),PRMT1 (p=0.004818 n=5),MSH2 (p=0.006325 n=35),CAPN1 (p=0.04059 n=10),COX5A (p=0.001425 n=2),RTN4 (p=0.02925 n=47),XPO1 (p=0.02363 n=6),ATXN10 (p…
	Cellular Growth and Proliferation	CDKN2A (p=0.0053 n=14),COPS4 (p=0.03944 n=4),VPRBP (p=0.001992 n=6),GAK (p=0.001862 n=22),EIF3E (p=0.002585 n=22),FOXC1 (p=0.01471 n=11),ITGAL (p=0.03049 n=13),COPS3 (p=0.0006728 n=11),APP (p=0.009438 n=62),AFF1 (p=0.0009123 n=37),MLLT1 (p=0.03627 n=12),ITGB2 (p=0.01301 n=25),HSP90B1 (p=0.02041 n=27),PRMT1 (p=0.004818 n=5),HDAC3 (p=0.0003562 n=9),COPS6 (p=0.0006931 n=8),EIF3A (p=0.0009801 n=6),FB…
	Cellular Movement	ITGB2 (p=0.01301 n=25),GRB2 (p=0.003008 n=8),RTN4 (p=0.02925 n=47),EIF3E (p=0.002585 n=22),NEDD4L (p=0.02774 n=120),ITGAL (p=0.03049 n=13),APP (p=0.009438 n=62)
	Cellular Response to Therapeutics	PRKDC (p=0.01746 n=12)
	DNA Replication, Recombination, and Repair	ATP5J (p=0.02005 n=6),CDKN2A (p=0.0053 n=14),PRKDC (p=0.01746 n=12),MSH2 (p=0.006325 n=35),ATP5H (p=0.04158 n=8),OLA1 (p=0.00795 n=25),MCM7 (p=0.0006931 n=7),APP (p=0.009438 n=62)
	Drug Metabolism	COMT (p=0.03903 n=21),APP (p=0.009438 n=62)
	Energy Production	ATP5J (p=0.02005 n=6),MSH2 (p=0.006325 n=35),ATP5H (p=0.04158 n=8),OLA1 (p=0.00795 n=25),APP (p=0.009438 n=62)
	Gene Expression	CASC3 (p=0.007937 n=4),CDKN2A (p=0.0053 n=14),AKAP8L (p=0.03422 n=5),HEATR1 (p=0.006608 n=26),TAB2 (p=0.0006013 n=43),LIMD1 (p=0.0009465 n=36),TCEB1 (p=0.01458 n=17),CIAO1 (p=0.007159 n=3),EIF3B (p=0.0001696 n=8),EIF3D (p=0.00274 n=15),EIF3A (p=0.0009801 n=6),LRPPRC (p=0.01102 n=46),TBL1XR1 (p=0.02007 n=25),FBXW11 (p=0.008805 n=18),PRKDC (p=0.01746 n=12),YWHAZ (p=0.01576 n=10),EIF3E (p=0.002585 n…
	Lipid Metabolism	SDHA (p=0.001114 n=5),LDLR (p=0.001904 n=18),COMT (p=0.03903 n=21),RTN4 (p=0.02925 n=47),CLN6 (p=0.03084 n=8),APP (p=0.009438 n=62)
	Molecular Transport	CDKN2A (p=0.0053 n=14),ITGB2 (p=0.01301 n=25),KIR3DL1 (p=0.00084 n=21),LDLR (p=0.001904 n=18),SMG6 (p=0.000795 n=48),RANBP2 (p=0.0242 n=3),PDIA4 (p=0.007587 n=10),CANX (p=0.04676 n=7),XPO1 (p=0.02363 n=6),ITGAL (p=0.03049 n=13),ATP2A2 (p=0.01145 n=5),APP (p=0.009438 n=62)
	Nucleic Acid Metabolism	ATP5J (p=0.02005 n=6),MSH2 (p=0.006325 n=35),ATP5H (p=0.04158 n=8),APP (p=0.009438 n=62),OLA1 (p=0.00795 n=25)
	Post-Translational Modification	FBXW11 (p=0.008805 n=18),CDKN2A (p=0.0053 n=14),PDIA5 (p=0.01907 n=40),NMT1 (p=0.002144 n=24),HAT1 (p=0.006391 n=5),CANX (p=0.04676 n=7),OS9 (p=1.987e-07 n=9),FBXO3 (p=0.006035 n=19),PLOD1 (p=0.03323 n=11),TCEB1 (p=0.01458 n=17),SKP1/SKP1P2,APP (p=0.009438 n=62),PRMT1 (p=0.004818 n=5),PDIA6 (p=0.006732 n=28),DNAJC7 (p=0.001263 n=8)
	Protein Synthesis	FBXW11 (p=0.008805 n=18),CDKN2A (p=0.0053 n=14),GRB2 (p=0.003008 n=8),CANX (p=0.04676 n=7),EIF3E (p=0.002585 n=22),FBXO3 (p=0.006035 n=19),MARS (p=0.006338 n=7),HSP90B1 (p=0.02041 n=27),DIAPH1 (p=7.851e-05 n=12),DDX6 (p=9.957e-05 n=8),EIF3B (p=0.0001696 n=8),EIF3D (p=0.00274 n=15),EIF3A (p=0.0009801 n=6),CLN6 (p=0.03084 n=8),EIF3K (p=0.007501 n=7)
	Protein Trafficking	CDKN2A (p=0.0053 n=14),RANBP2 (p=0.0242 n=3),PDIA4 (p=0.007587 n=10),XPO1 (p=0.02363 n=6),CANX (p=0.04676 n=7),APP (p=0.009438 n=62)
	RNA Damage and Repair	SMG6 (p=0.000795 n=48),EIF3E (p=0.002585 n=22)
	RNA Post-Transcriptional Modification	CDKN2A (p=0.0053 n=14),CASC3 (p=0.007937 n=4),HEATR1 (p=0.006608 n=26)
	RNA Trafficking	SMG6 (p=0.000795 n=48),EIF3A (p=0.0009801 n=6),XPO1 (p=0.02363 n=6)
	Small Molecule Biochemistry	SDHA (p=0.001114 n=5),ATP5J (p=0.02005 n=6),HAT1 (p=0.006391 n=5),PLOD1 (p=0.03323 n=11),ATP5H (p=0.04158 n=8),APP (p=0.009438 n=62),OLA1 (p=0.00795 n=25),ITGB2 (p=0.01301 n=25),PRMT1 (p=0.004818 n=5),LDLR (p=0.001904 n=18),MSH2 (p=0.006325 n=35),COMT (p=0.03903 n=21),RTN4 (p=0.02925 n=47),MTHFD2 (p=0.008336 n=8),CLN6 (p=0.03084 n=8),MCL1 (p=0.009192 n=8)
MS= multiple sclerosis; HIV= Human Immunodeficiency virus; EBV= Epstein Barr virus; HBV= Hepatitis B virus; MHC= Major histocompatibility complex
